# Estrogen and Raloxifene Stimulate Transforming Growth Factor- $\beta$ 3 Gene Expression in Rat Bone: A Potential Mechanism for Estrogen- or Raloxifene-Mediated Bone Maintenance

NA N. YANG, HENRY U. BRYANT, SUSHANT HARDIKAR, MASAHIKO SATO, RACHELLE J. S. GALVIN, ANDREW L. GLASEBROOK, AND JOHN D. TERMINE

*Endocrine Research, Lilly Research Laboratories, Eli Lilly & Co., Indianapolis, Indiana 46285*

## ABSTRACT

Estrogen or raloxifene (LY156758) prevent estrogen deficiency-induced bone loss in animals and humans. We demonstrated in the rat that a 22% reduction in bone mineral density generated by ovariectomy was associated with a 2-fold reduction of transforming growth factor- $\beta$ 3 (TGF $\beta$ 3) messenger RNA expression in the femur. Administration of 17 $\beta$ -estradiol or raloxifene to ovariectomized rats restored both bone mineral density and TGF $\beta$ 3 messenger RNA expression in the femur to levels measured in intact animals. In transient transfection assays, the promoter sequence from -38 to +110 of the human TGF $\beta$ 3 gene, which contains no palindromic estrogen response element, was sufficient to mediate 17 $\beta$ -estradiol or raloxifene induced-

reporter gene expression in presence of the estrogen receptor. Raloxifene activated TGF $\beta$ 3 promoter as a full agonist at nanomolar concentrations. In the same cellular system, raloxifene inhibited the estrogen response element-containing vitellogenin promoter expression as a pure estrogen antagonist. In two well characterized osteoclast differentiation models, TGF $\beta$ 3 significantly inhibited the differentiation and bone-resorptive activities of murine and avian osteoclasts. These findings suggest that regulation of TGF $\beta$ 3 gene expression by raloxifene or estrogen in bone may be an important target to mediate bone maintenance. (*Endocrinology* 137: 2075–2084, 1996)

**M**AINTENANCE OF bone mass is a dynamic process achieved by tightly coupled bone formation and resorption processes, so that no net gain or loss of bone mass is observed (1, 2). Multiple systemic and local factors such as cytokines, growth factors, steroids, and vitamin D play important roles to achieve normal bone balance (3–5). Recently, the gonadal steroid estrogen has attracted particular attention in bone research for its clinical effectiveness in preventing osteoporosis in women (6–8). Loss of estrogen at menopause is associated with a rapid reduction of bone mass, leading to porous bones prone to fracture. Estrogen replacement can effectively prevent this rapid bone loss in postmenopausal women and in clinically relevant animal models such as ovariectomized (OVX) rats, establishing a protective effect of estrogen on the skeleton (7, 8). Although the beneficial effects of estrogen on bone are clear, the overall value of hormone replacement therapy (HRT) has been questioned due to estrogen-associated side-effects, including uterine stimulation and increased risk of endometrial cancer (9).

Recently, studies of raloxifene (LY156758), a nonsteroidal benzothiophene derivative, have provided intriguing observations (10). In the breast and uterus, raloxifene is a classical antiestrogen that inhibited the growth of mammary or endometrial carcinoma as well as estrogen-induced uterine tissue proliferation (11–13). However, in nonreproductive tissues, raloxifene prevented bone loss and lowered serum

cholesterol with a pharmacological profile similar to that of estrogen in both OVX rats and postmenopausal women (14, 15). Such a tissue-selective estrogen agonist/antagonist profile of raloxifene has led to intensive preclinical and clinical investigations to explore the potential application of such chemical entities as ideal hormone replacement therapy (15).

Although compelling data in humans and animals demonstrating effectiveness of estrogen replacement for treating postmenopausal osteoporosis have accumulated rapidly in recent years, mechanistic understanding of how estrogen regulates bone homeostasis is still lagging behind. In reproductive tissues, estrogen-induced biological activities are mediated through the nuclear estrogen receptor (ER), which belongs to the steroid/thyroid hormone receptor superfamily (16, 17). Estrogen binding to ER induces a conformational change in the receptor that functions to activate gene transcription via a specific DNA element called the estrogen response element (ERE) (18). In bone, ER has been demonstrated to be expressed and function as a transcription factor (19, 20). Estrogen deficiency has also been associated with protein level changes of several growth factors, including transforming growth factor- $\beta$  (TGF $\beta$ ), insulin-like growth factor I (IGF-I), interleukin-1 (IL-1), IL-6, or tumor necrosis factor in bone tissue or osteoblast-like cells (21–24). However, whether transcriptional regulation of target genes is the key function for estrogen to regulate skeletal homeostasis and what target genes estrogen modulates in bone have not been fully elucidated.

To address these issues, we studied gene regulation by estrogen and raloxifene in femora of OVX rats. In this study, we examined gene expression of TGF $\beta$ , a key factor in bone

Received August 25, 1995.

Address all correspondence and requests for reprints to: Na N. Yang, Ph.D., Eli Lilly & Co., Lilly Research Laboratory, Endocrine Research, DC 0444, Lilly Corporate Center, Indianapolis, Indiana 46285.

formation, induction, and repair (21, 25), in response to ovariectomy and 17 $\beta$ -estradiol or raloxifene replacement. Three isoforms of TGF $\beta$ , TGF $\beta$ 1, -2, and -3, have been identified in humans and animals (26) and shown to be expressed in bone tissues (4, 21, 27). We demonstrated that ovariectomy decreased the messenger RNA (mRNA) expression level of a specific TGF $\beta$  isoform, TGF $\beta$ 3, in rat femur. Both 17 $\beta$ -estradiol and raloxifene elevated TGF $\beta$ 3 gene expression to sham control levels within 2 h of injection. We also demonstrated that a non-ERE-containing, 150-bp nucleotide sequence in the 5'-untranslated region of the human TGF $\beta$ 3 promoter could mediate 2- to a 6-fold up-regulation of chloramphenicol acetyltransferase (CAT) expression by 17 $\beta$ -estradiol or raloxifene in transient transfection assays, suggesting a transcriptional regulation of TGF $\beta$ 3 by both agents. In osteoclast differentiation systems, TGF $\beta$ 3 significantly inhibited osteoclast differentiation. Collectively, these data indicate that TGF $\beta$ 3 may be a target gene for estrogen-mediated bone maintenance. Regulation of TGF $\beta$ 3 by estrogen receptor may also use a non-ERE-mediated mechanism through which raloxifene functions as a *bona fide* agonist in bone.

## Materials and Methods

### Materials

Tamoxifen and 17 $\beta$ -estradiol were purchased from Sigma Chemical Co. (St. Louis, MO). Raloxifene (LY156758) was synthesized at the Lilly Research Laboratories (Indianapolis, IN) by a method originally reported by Jones *et al.* (10). The compound was greater than 98.5% pure, as determined by mass spectrometry and elemental analysis. ICI 164,384 was also synthesized at the Lilly Research Laboratories with greater than 98% purity. Recombinant human TGF $\beta$ 3 was purchased from R&D Systems (Minneapolis, MN).

### Animals

Female, virus antibody-free, Sprague-Dawley rats (10–11 weeks old) were obtained from Charles Rivers Laboratories (Portage, MI) and group housed on a 12-h light, 12-h dark cycle with room temperature set at 22 C. The animals were allowed to acclimate for 1 week with *ad libitum* access to food and water. Bilateral oophorectomies were performed under ketamine (120 mg/kg)-xylazine (24 mg/kg) anesthesia. After recovery from the surgical anesthesia, animals were divided into treatment groups (OVX control and 17 $\beta$ -estradiol, raloxifene, or tamoxifen treatment), and compound administration was initiated. 17 $\beta$ -Estradiol (0.1–30  $\mu$ g/kg-day), raloxifene, or tamoxifen (each at 0.01–1 mg/kg-day) were delivered sc in corn oil. All drugs were given in a volume of 0.1 mg/100 g BW. Experimental groups consisted of six animals per group (per dose). OVX and intact controls received vehicle injections.

After 5 weeks of treatment, rats were killed by carbon dioxide asphyxiation. The left femur was removed and frozen for subsequent single photon absorptiometry, which was performed on a Norland Digital Bone Densitometer (model 2780). Three transverse scans of 1 mm width were made, 6–7 mm proximal to the distal end of each femur. Measurements were made on randomized bones by an operator blinded as to the treatment group, who recorded the mean of three scan repetitions.

### Ribonuclease (RNase) protection assay (RPA)

OVX and sham-operated rats were treated with a single injection of 17 $\beta$ -estradiol, raloxifene, or tamoxifen at respective doses of 0.1, 1, and 1 mg/kg. Control animals received a single injection of vehicle (corn oil). Animals were killed 2, 6, and 24 h after injection. Both femora of the rat were excised. Total RNA were extracted using the UltraSpec RNA Isolation System (Biotecx Laboratories, Houston, TX). Total RNA (20  $\mu$ g) from each

femur were analyzed for TGF $\beta$  mRNA expression using the RPA II Ribonuclease Protection Assay Kit (Ambion, Austin, TX). To generate isoform-specific riboprobes, TGF $\beta$  complementary DNA (cDNA) templates were prepared by PCR amplification of a rat liver cDNA pool using the following primers: TGF $\beta$ 1: 5'-primer, TGCTCCAGCTCCACAGAG; 3'-primer, AAT-ACGACTCACTATAGGGTGTGGTTGTAGAGGGCA; TGF $\beta$ 2: 5'-primer, CTTCGTGCCGTCTAATAATT; 3'-primer, AATACGACTCAC-TATA GGGCAACAACATTAGCAGGAGA; and TGF $\beta$ 3: 5'-primer, GAATGGCIGICTTTCGATGT; 3'-primer, AATACGACTCACTAATAGGGCCATGGTCATCTTCAITGT. cDNA templates generated by these primer sets correspond to regions from 665–832, 690–840, and 1196–1365 of rat TGF $\beta$ 1, mouse TGF $\beta$ 2, and mouse TGF $\beta$ 3 cDNAs, respectively. <sup>32</sup>P-Labeled riboprobes were then generated by *in vitro* transcription of the cDNA templates using T7 polymerase. For internal gene expression control, a probe for rat glyceraldehyde-3-phosphate dehydrogenase (GAPDH) gene, expanding the region from 564–854 (GenBank, X02231), was also prepared and used as the control. After RNase digestion, protected probes were subjected to electrophoresis on 8 M urea-5% polyacrylamide gel to assure the proper sizes of the probes. The amount of radioactivity retained in the gel were quantitated using a PhosphorImager (Molecular Dynamics, Sunnyvale, CA) and normalized by GAPDH expression from the same RNA sample.

### Cell culture and transient transfection assay

Human MG63 osteosarcoma cells (American Type Culture Collection, Rockville, MD) were cultured in DMEM:F-12 (3:1) medium (with the addition of 0.1  $\mu$ g/liter sodium selenite, 2.2 g/liter sodium bicarbonate, 4.9 mg/liter ethanolamine HCl, and 20 mM HEPES, pH 7.4) containing 10% FBS (Hyclone, Logan, UT) and 50  $\mu$ g/ml tetracycline (Eli Lilly Co., Indianapolis, IN) at 37 C in 7% CO<sub>2</sub>. For transfection, cells were seeded in DMEM:F-12 (3:1) medium containing 10% charcoal-dextran-treated FBS (Hyclone) 24 h before transfection. Reporter plasmid (TGF $\beta$ CAT; 10  $\mu$ g), ER expression plasmid (pCMVER; 5  $\mu$ g), and reference plasmid (pSV- $\beta$ -galactosidase vector, Promega Corp., Madison, WI; 5  $\mu$ g) were cotransfected into cells by the calcium phosphate precipitation method (Profection kit, Promega) and left on cells for 24 h. Cells were then switched to fresh medium containing 10% charcoal-dextran-treated FBS and treatment compounds for an additional 24 h. At the end of treatment, cellular proteins were extracted from cells in 0.25 M Tris buffer, pH 7.8, by three cycles of freeze/thawing (–80 C/37 C) in a dry ice-ethanol bath. Cell lysates containing 100  $\mu$ g total proteins were used to assay for CAT and  $\beta$ -galactosidase activities. The acetylated and nonacetylated forms of labeled chloramphenicol were separated on TLC plates and analyzed using the  $\beta$ -scope 603 blot analyzer (Betagen Corp., Waltham, MA). CAT activity was defined by the percent conversion of acetylation normalized by  $\beta$ -galactosidase activity.

### DNA plasmids used in transfection experiments

The ER expression plasmid, pCMVER, was obtained from Dr. Benita Katzenellenbogen and described previously (28). TGF $\beta$  promoter-CAT reporter plasmids used in this study were provided by Drs. Michael Sporn and Anita Roberts at the NIH. All of these plasmids were constructed using the same vector with an inserted TATA-less CAT gene. TGF $\beta$ 1CAT was reported previously as pHTG2 (29), which contains human TGF $\beta$ 1 promoter sequence from –1132 to +11 in front of the CAT gene. TGF $\beta$ 2CAT, previously reported as pB2–1728 (30), contains human TGF $\beta$ 2 promoter sequence from –1728 to +3. TGF $\beta$ 3CAT, reported as pB3–499 (31), contains the promoter sequence from –499 to +110 of the human TGF $\beta$ 3 gene, whereas pB3–38 reporter plasmid contains a shorter sequence of TGF $\beta$ 3 promoter (–38 to +110) in front of the CAT gene (31). The vitellogenin A2 promoter CAT plasmid, VIT-ERE-CAT (–331/–87VitCAT), was constructed according to the method of Klein-Hitpass *et al.* (18).

### Osteoclast differentiation assay

Chicken osteoclast differentiation model (32, 33). Monocytes were isolated from the medullary bone of femora and tibia from egg-laying hens maintained on a calcium-deficient diet for 2 weeks and aliquoted at a density of  $3 \times 10^5$ /cm<sup>2</sup>. Cultures were incubated with 0.001–10 ng/ml

recombinant human TGF $\beta$ 3 for 7 days in 5% CO $_2$ -air at 39 C. Bone resorption was quantitated between days 5–7 by measuring  $^3\text{H}$  release into the medium from bone particles (20–53  $\mu\text{m}$ ) prelabeled *in vivo* with [ $^3\text{H}$ ]proline (34). Hiura *et al.* (33) showed previously that the mass of  $^3\text{H}$ -labeled bone resorbed correlates with Howships lacunae resorbed in bone slices with  $r = 0.98$ .

**Mouse osteoclast differentiation cultures.** The coculture method of Takahashi *et al.* (35) was modified and used to study the effects of TGF $\beta$ 3 on osteoclast differentiation. A stable cell line, BALC, which supported osteoclast differentiation, was derived from neonatal BALB/C calvariae. The BALC cells (75,000 cells/chamber) were cocultured in Lab-Tek chamber slides (four-chamber, Nunc Inc., Naperville, IL) with bone marrow cells (150,000 cells/chamber) obtained from murine femora (8-week-old female BALB/C mice; Jackson Laboratories, Bar Harbor, ME). The cocultures were maintained in RPMI plus 5% heat-inactivated FBS (Hyclone) and 1% antibiotic-antimycotic solution (Life Technologies, Grand Island, NY) and treated with 10 nM 1,25-dihydroxyvitamin D $_3$  (Biomol, Plymouth Meeting, PA) and 0.01–10 ng/ml recombinant human TGF $\beta$ 3. Medium was changed every 48–72 h, and fresh 1,25-dihydroxyvitamin D $_3$  and TGF $\beta$ 3 were added. On day 8, the cells were fixed with formalin and stained for tartrate-resistant acid phosphatase (TRAP). The number of TRAP-positive cells containing three or more nuclei was quantitated. These multinucleated cells were confirmed to be osteoclast-like, as demonstrated by their ability to form resorption lacunae when exposed to bovine cortical bone slices and the ability of calcitonin to inhibit TRAP-positive multinucleated giant cell formation and bone resorption (data not shown in this paper).

## Results

### Bone-sparing effects of estrogen and raloxifene

The effects of 17 $\beta$ -estradiol or raloxifene on bone in the OVX rat are shown in Fig. 1. As previously shown (14), the 5-week ovariectomy period produced a 22% reduction ( $P \leq 0.05$ ) in the bone mineral density of the distal metaphyseal region of the femur. Administration of 17 $\beta$ -estradiol or raloxifene to OVX rats *sc* produced dose-related prevention of bone loss due to OVX, with respective ED $_{50}$  values of 2 and 80  $\mu\text{g}/\text{kg}$ . These results were comparable to those of previous studies with oral gavage administration of raloxifene (14). The minimal effective

dose ( $P \leq 0.05$ ) was 1  $\mu\text{g}/\text{kg}$  for 17 $\beta$ -estradiol and 30  $\mu\text{g}/\text{kg}$  for raloxifene. In this particular study, both 17 $\beta$ -estradiol and raloxifene resulted in bone density levels that reached the level measured in intact rats at 0.03 mg/kg for 17 $\beta$ -estradiol or 1 mg/kg for raloxifene. Tamoxifen, a partial estrogen agonist/antagonist, offered partial protection from ovariectomy-induced bone loss with an ED $_{50}$  value of 0.7 mg/kg and a minimal effective dose ( $P \leq 0.05$ ) of 0.3 mg/kg. A 50% protection of bone mineral density loss by tamoxifen was achieved at the dose of 1 mg/kg.

### TGF $\beta$ mRNA expression in rat bone

Although the mechanism of estrogen deficiency-induced bone loss is largely unknown, it has been reported that ovariectomy reduced the concentration of TGF $\beta$ , a key coupling factor of bone remodeling, in rat bone tissue (4, 21, 25). To establish if and at what level ovariectomy/estrogen replacement influenced TGF $\beta$  expression, we measured TGF $\beta$  mRNA levels in the femora of these animals. As shown in Fig. 2A, femoral TGF $\beta$ 1 mRNA expression in sham-operated control female rats (Sham + vehicle) varied slightly (1.5-fold) during the 24-h treatment period. The level of TGF $\beta$ 1 mRNA expression in OVX rats was more consistent and at the highest level observed in sham control animals (OVX + vehicle). This level of TGF $\beta$ 1 mRNA expression in OVX rats (OVX + vehicle) was not affected by treatment with either 0.1 mg/kg 17 $\beta$ -estradiol (OVX + E $_2$ ) or 1 mg/kg raloxifene (OVX + Ral). Expression of TGF $\beta$ 2 showed a similar pattern as TGF $\beta$ 1 in the femur, where neither estrogen (OVX + E $_2$ ) nor raloxifene (OVX + Ral) treatment affected the expression of this message in OVX rats (OVX + vehicle) significantly (Fig. 2B). In contrast, ovariectomy caused a consistent 2-fold reduction of TGF $\beta$ 3 mRNA expression in the femur (OVX + vehicle *vs.* Sham + vehicle; Fig. 2C). This reduction of TGF $\beta$ 3 mRNA expression was rapidly restored to the sham control level by

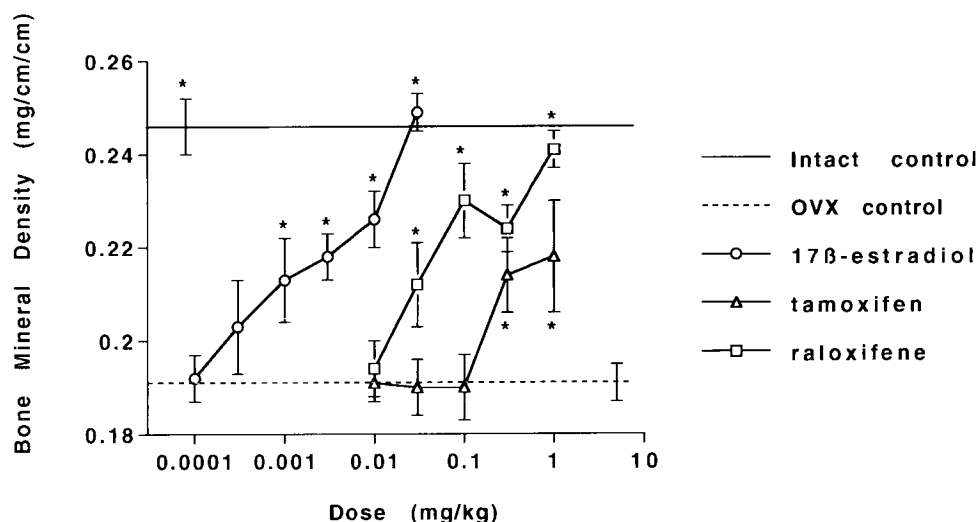

FIG. 1. Effects of 17 $\beta$ -estradiol, raloxifene, or tamoxifen on bone mineral density were determined in 75-day-old OVX rats. After ovariectomy, animals were given daily *sc* doses of the above agents at the indicated dosage levels for a period of 35 days, after which the animals were killed, and the left femur was removed. Bone mineral density was determined by single photon absorptiometry of the excised femur. The mean value of three transverse scans of the distal metaphyseal region (6–7 mm proximal to the distal end of the femur) was recorded. Statistical evaluation of the effects of 17 $\beta$ -estradiol, raloxifene, or tamoxifen on bone mineral density was made by one-way ANOVA with *post-hoc* Fisher's protected least significant difference analysis when indicated. Statistical significance was ascribed at  $P \leq 0.05$ . \*,  $P \leq 0.05$  *vs.* OVX control.

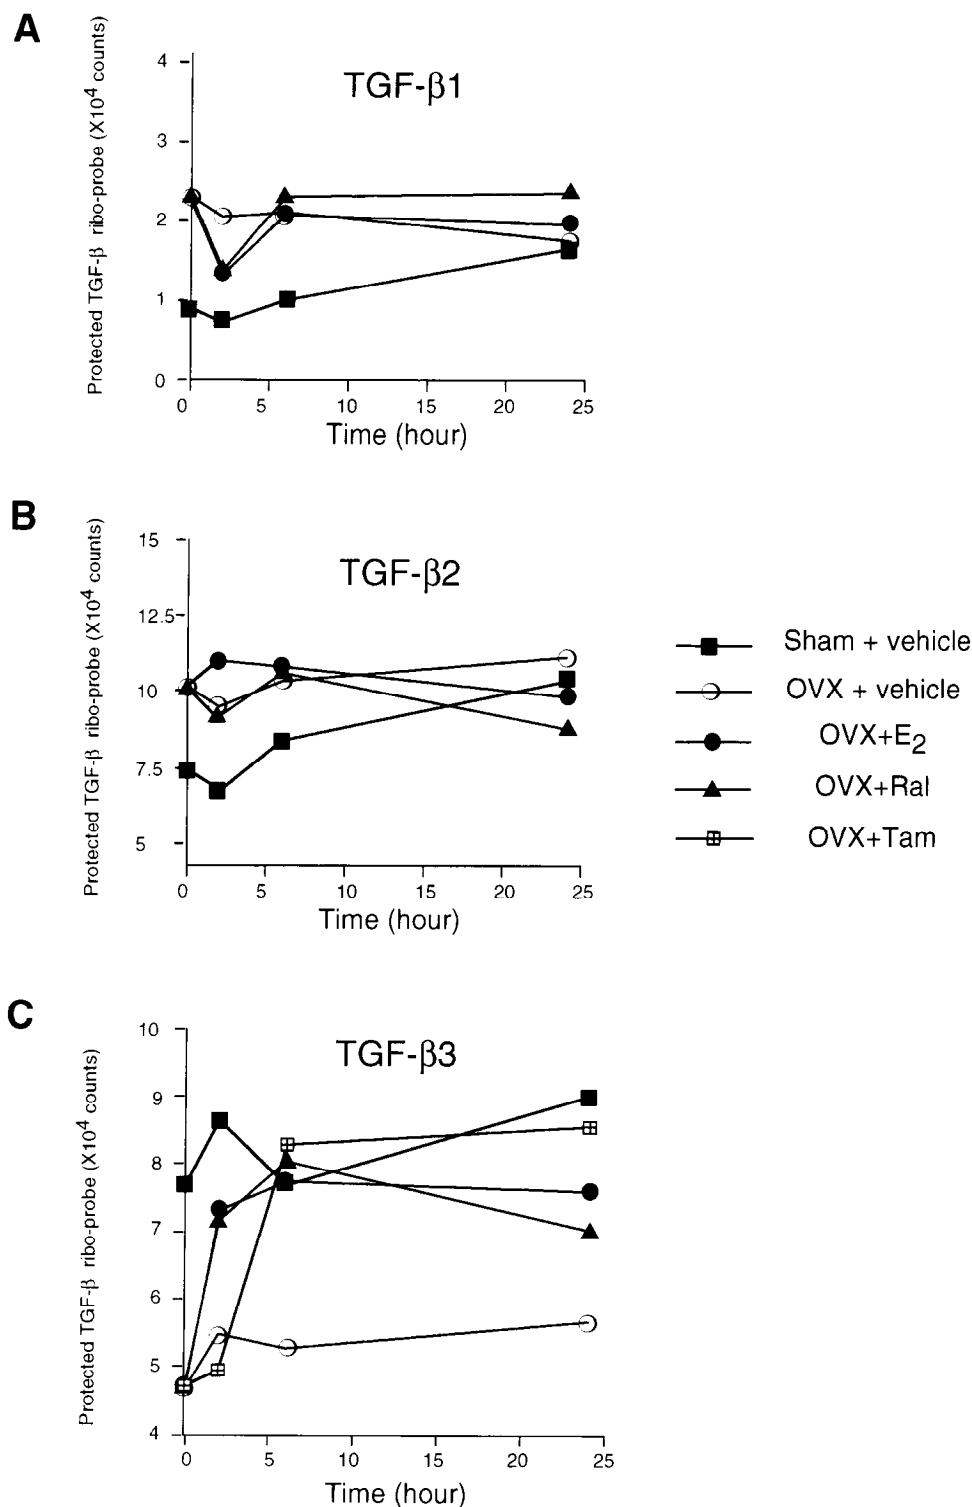

FIG. 2. Effects of ovariectomy and estrogen or raloxifene replacement on TGF $\beta$  mRNA expression in rat femora. Seventy-five-day-old Sprague-Dawley female rats were either sham operated or OVX 14 days before treatment. Treatment groups included 17 $\beta$ -estradiol (OVX + E<sub>2</sub>) at 0.1 mg/kg, raloxifene (OVX + Ral) at 1 mg/kg or tamoxifen (OVX + Tam) at 1 mg/kg, each given sc. Sham control (Sham + vehicle) or OVX control (OVX + vehicle) rats received vehicle (corn oil) only. Animals were killed 2, 6, and 24 h after injection. Femora were excised for total RNA preparation. Levels of TGF $\beta$  mRNA expression in 20  $\mu$ g total RNA were evaluated by RNase protection assays using isoform-specific TGF $\beta$  probes. Data were quantitated and normalized by GAPDH mRNA expression and plotted in the graph. Data are representative of two independently performed RPA assays.

either 17 $\beta$ -estradiol (0.1 mg/kg) or raloxifene (1 mg/kg) treatment within 2 h of injection. Tamoxifen injection (1 mg/kg) also restored TGF $\beta$ 3 expression after 6 h of treatment.

#### Activation of promoters of TGF $\beta$ genes by 17 $\beta$ -estradiol and raloxifene

The intriguing observation that raloxifene, an agent previously defined as an antiestrogen in reproductive functions,

stimulated TGF $\beta$ 3 mRNA production *in vivo* in a manner similar to 17 $\beta$ -estradiol led us to further examine the mechanism of this regulation. To investigate whether 17 $\beta$ -estradiol or raloxifene could modulate TGF $\beta$ 3 expression directly through its promoter, we performed transient cotransfection experiments using a TGF $\beta$  promoter-CAT reporter construct and an ER expression plasmid in human MG63 osteosarcoma cells. As shown in Fig. 3A, TGF $\beta$ 3CAT expression was sig-

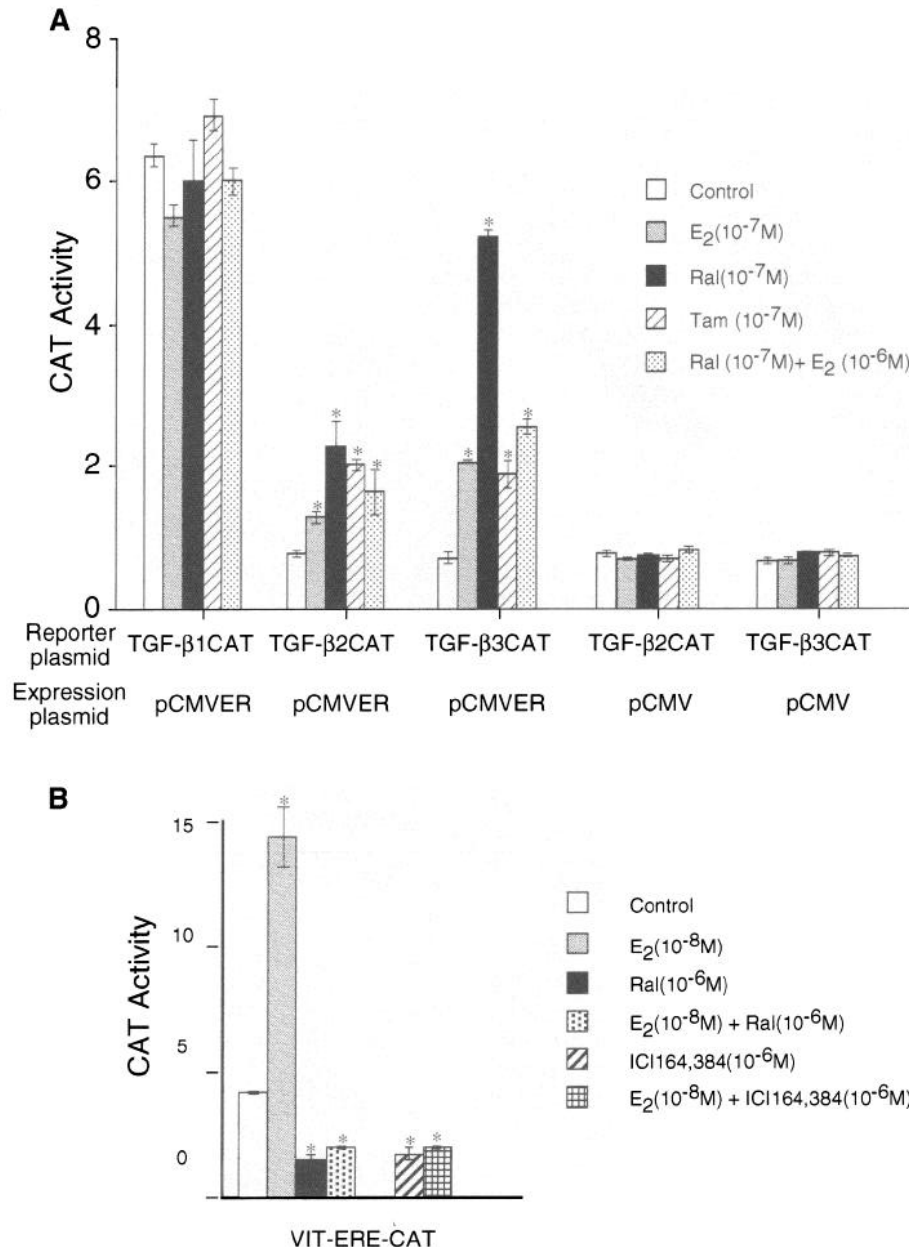

FIG. 3. ER-mediated TGF $\beta$ 2 and TGF $\beta$ 3 CAT activation by estrogen or raloxifene showed a novel ligand selectivity. A, Human osteosarcoma MG63 cells were cotransfected with each of the TGF $\beta$ CAT plasmids, ER expression plasmid pCMVER or the arental plasmid pCMV and reference plasmid pSV- $\beta$ -galactosidase vector. Cells were treated with 10<sup>-7</sup> M each of raloxifene (black bars), 17 $\beta$ -estradiol (gray bars), tamoxifen (hatched bars), or a combination of raloxifene (10<sup>-7</sup> M) and 17 $\beta$ -estradiol (10<sup>-6</sup> M) (dotted bars) for 24 h after transfection. CAT activities were plotted as the mean and SD of three independently transfected samples. CAT activities were normalized by  $\beta$ -galactosidase activities for internal transfection control. B, Transfection experiments identical to those in A were performed using vitellogenin promoter containing CAT construct, VIT-ERE-CAT, in place of TGF $\beta$ CAT constructs. Treatment included 10<sup>-8</sup> M 17 $\beta$ -estradiol (gray bar), 10<sup>-6</sup> M raloxifene (black bar), 10<sup>-6</sup> M ICI 164,384 (hatched bar), and combinations of 10<sup>-8</sup> M 17 $\beta$ -estradiol with 10<sup>-6</sup> M raloxifene (dotted bar) or 10<sup>-6</sup> M ICI 164,384 (checkered box). Data are representative of three independently performed transfection experiments. Each data point is presented as the mean and SD of triplicate samples obtained from a single experiment. In both A and B, data were analyzed using one-way ANOVA followed by a least significant difference multiple comparison test (Dunnnett's). Statistical significance was ascribed at  $P < 0.01$ . \*,  $P < 0.01$  vs. vehicle control.

nificantly up-regulated by raloxifene, with a 7-fold increase, and by 17 $\beta$ -estradiol or tamoxifen, with 2-fold increases. TGF $\beta$ 2CAT expression was also up-regulated by these agents, but only with a marginal 1.5-fold increase by 17 $\beta$ -estradiol and a 2-fold increase by raloxifene or tamoxifen. TGF $\beta$ 1CAT expression, on the other hand, showed no re-

sponse to either of these agents, although it was expressed at a higher basal level. Therefore, the promoter selectivity of 17 $\beta$ -estradiol or raloxifene activation *in vitro* paralleled the TGF $\beta$  isoform-specific regulation patterns by these two agents *in vivo* (Fig. 2). More interestingly, raloxifene up-regulated TGF $\beta$ 2CAT and TGF $\beta$ 3CAT more potently than

17 $\beta$ -estradiol, which functioned as a partial agonist/antagonist of raloxifene in these promoter contexts. When 17 $\beta$ -estradiol was given alone, it partially up-regulated TGF $\beta$ 2CAT and TGF $\beta$ 3CAT expression (Fig. 3A, *gray bars*), whereas when a 10-fold molar excess of 17 $\beta$ -estradiol ( $K_d = 0.1$  nM) was given in combination with 100 nM raloxifene ( $K_d = 0.2$  nM), it inhibited the high level expression of TGF $\beta$ 2CAT and TGF $\beta$ 3CAT induced by raloxifene to its intrinsic partial activation level (Fig. 3A, *dotted bars*). This unusual ligand selectivity of TGF $\beta$ 3 activation was more evident when compared to regulation of the classical ERE-containing vitellogenin promoter by these agents. When the vitellogenin promoter-CAT reporter plasmid (VIT-ERE-CAT) was cotransfected with pCMVER in MG63 cells, vitellogenin promoter responded to 17 $\beta$ -estradiol ( $E_2$ ) with a 3-fold up-regulation (Fig. 3B, *gray bar*). Raloxifene, on the other hand, was not only incapable of up-regulating the vitellogenin promoter, but also suppressed the basal expression level of VIT-ERE-CAT by 2.5-fold (Fig. 3B, *black bar*). When given at a 100-fold molar excess, raloxifene completely blocked the up-regulation of VIT-ERE-CAT expression by 17 $\beta$ -estradiol (Fig. 3B, *dotted bar*), demonstrating a pure antiestrogen activity similar to that of the pure antiestrogen, ICI 164,384. As shown in the same graph, ICI 164,384 suppressed the basal activity of the vitellogenin promoter in the absence of 17 $\beta$ -estradiol and completely blocked the activity up-regulated by 17 $\beta$ -estradiol when given in combination (Fig. 3B). Such promoter-dependent regulation by raloxifene through ER is not a cell-specific event. In MCF-7, HeLa, and Chinese hamster ovary (CHO) cells, similar regulation patterns were observed on both TGF $\beta$ 3 promoter and vitellogenin promoter in transfection assays (data not shown).

To demonstrate that up-regulation of TGF $\beta$ 3 by 17 $\beta$ -estradiol or raloxifene and tamoxifen was mediated by ER, the parental expression plasmid pCMV was used to replace pCMVER in transfection assays. As shown in Fig. 3A, neither 17 $\beta$ -estradiol, tamoxifen, nor raloxifene was able to up-regulate TGF $\beta$ 2CAT or TGF $\beta$ 3CAT (pCMV lanes) expression above the control value in the absence of ER.

#### A 150-nucleotide region in TGF $\beta$ 3 promoter that mediates 17 $\beta$ -estradiol- or raloxifene-induced TGF $\beta$ 3 up-regulation

To further examine whether this unusual hormone selectivity of TGF $\beta$ 3 promoter activation was dose dependent, pB3-38 CAT reporter plasmid (31), containing the promoter region of hTGF $\beta$ 3 from -38 to +110, was cotransfected in MG63 cells with pCMVER. As shown in Fig. 4A, both raloxifene and 17 $\beta$ -estradiol up-regulated pB3-38 in a dose-dependent manner. Raloxifene was consistently a more potent activator of TGF $\beta$ 3 than 17 $\beta$ -estradiol in the dose range tested in this study. The sequence composition from -38 to +110 of the hTGF $\beta$ 3 gene is illustrated in Fig. 4B. Noticeably, no palindromic ERE sequence was present in this region.

#### Inhibition of osteoclast differentiation by TGF $\beta$ 3

Next, we addressed the potential biological consequences of elevated TGF $\beta$ 3 production in bone by 17 $\beta$ -estradiol or raloxifene. Although TGF $\beta$ 1 and -2 have been demonstrated

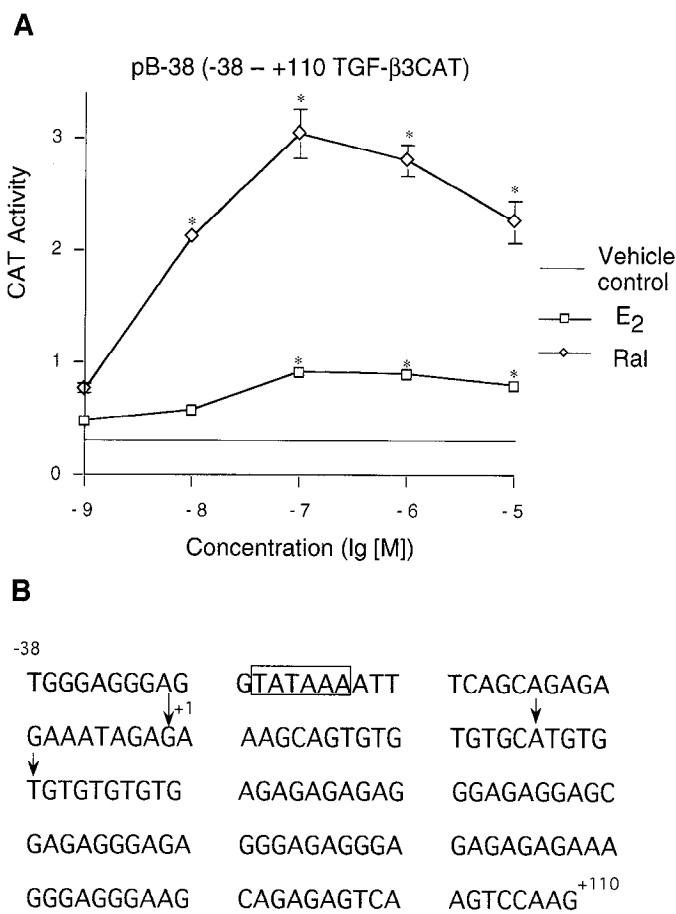

FIG. 4. Activation of TGF $\beta$ 3 by 17 $\beta$ -estradiol and raloxifene was mediated through an 150-bp nucleotide sequence in the promoter region. A, pB3-38, a CAT reporter plasmid driven by the promoter sequence from position -38 to +110 of human TGF $\beta$ 3, was cotransfected in MG63 cells with pCMVER. Cells were treated with  $10^{-6}$ - $10^{-9}$  M 17 $\beta$ -estradiol, raloxifene, or vehicle as control. CAT activity was normalized by  $\beta$ -galactosidase activity and plotted on the graph. Each data point is presented as the mean and SD of triplicate samples obtained from a single experiment. Data are representative of three independently performed transfection experiments. SDs for control, estrogen-treated, and 10 nM raloxifene-treated samples were smaller than the symbols. Statistical analysis was performed as described in Fig. 3A. Statistical significance was ascribed at  $P < 0.01$ . \*,  $P < 0.01$  vs. vehicle control. B, Nucleotide sequence of the region from -38 to +110 of the TGF $\beta$ 3 promoter (31). Arrowheads indicate the major (+1) or minor transcription initiation sites. The TATA sequence is boxed. Numbers indicate nucleotide positions relative to the major transcription initiation site.

to be potent inhibitors of osteoclast differentiation in different *in vitro* and *in vivo* models, such as rat long bone and human osteoclast cell cultures (36), TGF $\beta$  isoforms have been known to have different or even opposite effects on the same biological processes (37). To evaluate the effects of TGF $\beta$ 3 on osteoclast differentiation, we used two well characterized osteoclast differentiation models. In a chicken osteoclast differentiation system (32, 33), attachment-selected monocytes from the medullary bone of egg-laying hens were cultured in the presence of TGF $\beta$ 3 for 1 week. The osteoclast-specific differentiation markers of bone resorption were evaluated between days 5-7. As shown in Fig. 5A, TGF $\beta$ 3 significantly inhibited the resorption activity of these cells in a dose-

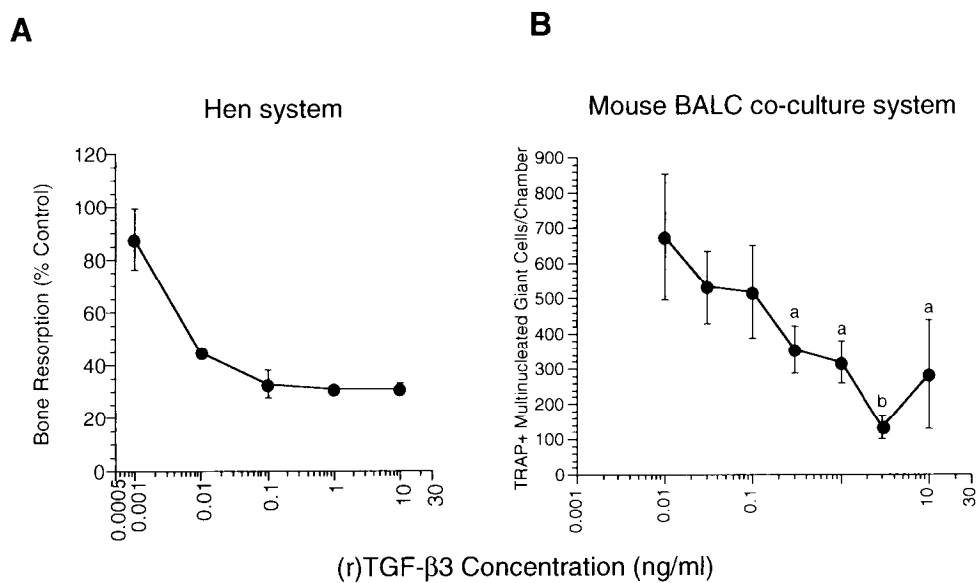

FIG. 5. Inhibition of osteoclast differentiation and bone resorption by TGF $\beta$ 3 *in vitro*. A, The effects of TGF $\beta$ 3 on differentiation and bone-resorbing activity of chicken osteoclast were evaluated in the chicken osteoclast differentiation model. Monocyte cultures from the medullary bone of egg-laying hens were incubated with 0.001–10 ng/ml recombinant human TGF $\beta$ 3 for 7 days in 5% CO $_2$ -air at 39 C. On day 7, monocyte cultures were incubated with *in vivo* [ $^3$ H]proline-prelabeled bone particles (20–50  $\mu$ m) (21) to measure  $^3$ H release into the medium. Data are presented as resorption (micrograms) compared to that in untreated controls (mean  $\pm$  SD; n = 3–4). B, Effects of TGF $\beta$ 3 on murine osteoclasts. Murine calvarial-derived cells, BALC, were cocultured with bone marrow cells in the continuous presence of 10 nM 1,25-dihydroxyvitamin D $_3$ , and 0.01–10 ng/ml recombinant human TGF $\beta$ 3 for 8 days. On day 8, the cultures were fixed with formalin and stained for TRAP. The number of TRAP-positive cells containing three or more nuclei were quantitated and are plotted in the figure. Each data point represents the mean and SD of four chambers. Data were analyzed using a one-way ANOVA followed by a least significant difference multiple comparison analysis (Tukey-Kramer) to determine the differences between individual groups. The level of significance was set at  $P < 0.05$  compared to the control. a,  $P < 0.05$  compared to the 0.01 ng/ml group. b,  $P < 0.05$  compared to the 0.01, 0.03, and 0.1 ng/ml groups. Data are representative of three experiments using different cell populations.

responsive manner. Similar effects on osteoclast differentiation were observed with the mouse model of Takahashi *et al.* (35). *In vitro* osteoclast differentiation was observed when calvarial-derived BALC cells were cocultured with bone marrow-derived osteoclast progenitor cells in the presence of 1,25-dihydroxyvitamin D $_3$ . As shown in Fig. 5B, the addition of TGF $\beta$ 3 inhibited the formation of TRAP-positive osteoclast-like cells in a dose-dependent manner. These multinucleated cells were demonstrated to have the ability to form resorption lacunae when exposed to bovine cortical bone slices. Furthermore, calcitonin was able to inhibit TRAP-positive multinucleated giant cell formation and bone resorption.

TGF $\beta$  has been reported to be produced by both osteoblasts and osteoclasts (38, 39). In addition, studies have demonstrated that osteoclasts can activate latent TGF $\beta$ . Thus, the levels of TGF $\beta$  added to the cultures could have been slightly higher than indicated by the amount of exogenous TGF $\beta$  added. To evaluate whether endogenously produced or activated TGF $\beta$  was a major source of the observed osteoclast differentiation, we incubated the coculture system with TGF $\beta$ -neutralizing antibodies. No statistically significant difference in TRAP-positive osteoclast-like cell numbers was observed between cultures with and without antibodies, indicating that the effects observed in Fig. 5 were largely due to TGF $\beta$ 3 added exogenously to the cultures (data not shown here). Additionally, inhibitory effects of TGF $\beta$ 3 were observed in a porcine osteoclast differentiation model. Thus, we conclude that TGF $\beta$ 3 inhibits osteoclast differentiation and

bone resorption, which may be part of the mechanism by which 17 $\beta$ -estradiol and raloxifene prevent the loss of bone due to estrogen deficiency.

## Discussion

The cellular and molecular targets of estrogen action in bone have been the focus of investigation for understanding of estrogen-mediated bone maintenance. Previous data indicated that estrogen may exert its biological functions in bone by influencing the expression of local factors that play important roles in skeletal homeostasis. To identify target genes of estrogen regulation in bone, we examined *in vivo* and *in vitro* regulation of the TGF $\beta$  by 17 $\beta$ -estradiol or a selective ER modulator (SERM), raloxifene. Our data provide insights in understanding the mechanisms by which estrogen and raloxifene act on bone.

First, using the OVX rat model, we demonstrated TGF $\beta$ 3 as a potential target gene under 17 $\beta$ -estradiol regulation in intact rat bone. The data presented in this study suggest that withdrawal of estrogen in OVX rats or postmenopausal women causes decreased expression of TGF $\beta$ 3 in bone. 17 $\beta$ -Estradiol or raloxifene can transcriptionally up-regulate TGF $\beta$ 3 gene in bone. This increased level of TGF $\beta$ , therefore, will inhibit osteoclast differentiation and bone loss. A closer examination of the data presented in this study suggests that TGF $\beta$ 3 may not be the sole causative agent in estrogen-mediated bone metabolism as one compares the *in vivo* bone

protective activities of raloxifene and 17 $\beta$ -estradiol to the *in vitro* activities of these agents to transactivate TGF $\beta$ 3 promoter. In OVX rats, 17 $\beta$ -estradiol is 30- to 40-fold more potent than raloxifene to protect against ovariectomy-induced bone density loss. However, in transient transfection assays, raloxifene was 4-fold more potent than 17 $\beta$ -estradiol (Fig. 4). This may be explained by the observations that estrogen affects multiple factors in bone, including IGF-I, IL-1, and IL-6, which all play crucial roles in bone metabolism (23, 24). Future studies concerning whether TGF $\beta$ , IGF-I, IL-6, IL-1, and other factors were regulated by estrogen sequentially or simultaneously in bone in a spatially and temporally specific manner will further establish the mechanism by which estrogen regulates skeletal homeostasis.

Second, estrogen and raloxifene regulation of TGF $\beta$  is isoform specific. Our data showed that TGF $\beta$ 3 was activated by 17 $\beta$ -estradiol or raloxifene both *in vivo* and *in vitro*. TGF $\beta$ 2 was activated by raloxifene weakly as determined by *in vitro* promoter analysis. However, such a weak promoter response was not translated into a message change in intact animals, possibly due to the lower sensitivity of the promoter. TGF $\beta$ 1 demonstrated no response to either raloxifene or estrogen in intact bone tissue or *in vitro* promoter analysis. Such differential promoter sensitivity of TGF $\beta$  genes in response to hormonal regulation suggests a divergence of their biological activities and regulation. TGF $\beta$ s are multifunctional growth modulators that play a central role in numerous physiological and pathological processes by mediating cell growth and differentiation (40, 41). Although all three isoforms share the same receptor systems and are interchangeable in most *in vitro* assay systems, each isoform is expressed in a developmental and tissue-selective fashion (42). Distinct properties of each of the isoforms in several biological systems have been noted. For instance, in an adult rodent cutaneous wound-healing model, reduction of scarring required the addition of TGF $\beta$ 3 and the neutralization of TGF $\beta$ 1 and -2 simultaneously (37). TGF $\beta$ 2 and TGF $\beta$ 3, but not TGF $\beta$ 1, inhibit the survival of cultured chick ciliary ganglionic neurons (43). TGF $\beta$ 1 and TGF $\beta$ 3 are more potent than TGF $\beta$ 2 in inhibiting the migration of aortic endothelial cells (44). Furthermore, although TGF $\beta$ 2 and TGF $\beta$ 3 share homology in their promoter regions, the promoter of TGF $\beta$ 1 is quite divergent, leading to speculation that each gene is distinctively regulated in a spatially and temporally specific manner. The data presented in this study provide additional experimental evidence to support such a hypothesis.

Third, our data established a direct promoter regulation of TGF $\beta$  gene by the ER. Cross-talk between steroid hormones and TGF $\beta$  has been observed at many different levels to coordinate specific events of cell proliferation and differentiation (42). The demonstration of direct gene regulation of the multifunctional growth factor, TGF $\beta$ , by estrogen may provide a molecular understanding of many estrogen-related activities observed in man and animals. For instance, TGF $\beta$  is a factor known to play important roles in regulating cardiovascular functions, including smooth muscle cell proliferation, low density lipoprotein receptor up-regulation, and nitric oxide synthase modulation (45–47). TGF $\beta$  has also been known to suppress cancer cell proliferation (48), stimulate apoptosis in different tissue or cell types (49, 50), and

provide neuronal protection by regulating BCL-2 protein expression and calcium homeostasis (51). Expression of TGF $\beta$  is highly responsive to external stimuli in the brain (52). Hence, through TGF $\beta$  regulation, we may gain further mechanistical understanding of estrogen-regulated biological processes in the central nervous system, cardiovascular system, and cancer progression, as well as reveal potential new biological functions previously unknown to estrogen.

Lastly, data presented in this study suggest that TGF $\beta$ 3 might represent a novel regulatory pathway of gene regulation by ER distinct from ERE-containing genes. The difference of TGF $\beta$ 3 activation from ERE activation was suggested by the lack of ERE in its promoter and the reversed ligand preference for TGF $\beta$ 3 activation by ER shown in Figs. 3 and 4. Previously, raloxifene was shown to exhibit a classical antiestrogenic profile in regulating the progesterone receptor gene, a conventional ERE-containing estrogen-inducible gene, in breast cancer cells and rat uterus on which gene 17 $\beta$ -estradiol functioned as the full agonist (53, 54). We have confirmed in this study a pure antiestrogenic activity of raloxifene on another ERE-containing gene, the vitellogenin gene. In the TGF $\beta$ 3 promoter system, however, the preferred ligand was raloxifene, whereas 17 $\beta$ -estradiol functioned as a partial agonist/antagonist that activated the TGF $\beta$ 3 promoter partially and only at pharmacological concentrations. Based on such observations, we speculate that an endogenous ligand different from 17 $\beta$ -estradiol may be the functional "hormone" of TGF $\beta$ 3 activation *in vivo*. The SERM molecule, raloxifene, mimics the endogenous ligand as a *bona fide* agonist. Further elucidation of the response element, ligand requirement, as well as ER functions in TGF $\beta$ 3 activation by ER followed by identification of other potential genes under the new regulatory pathway may further address the molecular mechanism through which SERM molecules, such as raloxifene, function as a tissue-selective estrogen agonist/antagonist. In conclusion, our study provided a molecular target for estrogen regulation of skeletal homeostasis through which raloxifene functions as a *bona fide* agonist in bone.

### Acknowledgments

We thank John R. Kim, Usha Srinivasan, Peggy Bryan, Lorri L. Short, Harlan W. Cole, David E. Magee, and Charles Brown for excellent technical support. We thank Drs. Anita Roberts and Michael Sporn for kindly providing us with pHTG2, pB2-1728, pB3-38, and pB3-499 CAT constructs, and Dr. Benita Katzenellenbogen for kindly providing us with pCMV and pCMVER plasmids. We are very grateful to Drs. Janet Hock and Marlene Cohen of the Lilly Research Labs for critically reviewing the manuscript.

### References

1. Parfitt AM 1994 Osteonal and hemi-osteonal remodeling—the spatial and temporal framework for signal traffic in adult human bone. *J Cell Biochem* 55:272–286
2. Suda T, Takahashi N, Martin TJ 1992 Modulation of osteoclast differentiation. *Endocr Rev* 13:66–80
3. Horowitz MC 1993 Cytokines and estrogen in bone: anti-osteoporotic effects. *Science* 260:626–627
4. Centrella M, Horowitz MC, Wozney JM, McCarthy TL 1994 Trans-



- forming growth factor- $\beta$  gene family members and bone. *Endocr Rev* 15:27–39
5. **Walters MR** 1992 Newly identified actions of the vitamin D endocrine system. *Endocr Rev* 13:719–764
  6. **Lindsay R, Aitken JM, Anderson JB** 1976 Long-term prevention of postmenopausal osteoporosis by estrogen. *Lancet* 1:1038–1041
  7. **Barzel US** 1988 Estrogens in the prevention and treatment of postmenopausal osteoporosis: a review. *Am J Med* 85:847–850
  8. **Kalu DN, Liu CC, Salerno E, Hollis B, Echon R, Ray M** 1991 Skeletal response of ovariectomized rats to low and high doses of 17 beta-estradiol. *J Bone Miner Res* 14:175–187
  9. **Barrett-Conner E** 1992 Hormone replacement and cancer. *Br Med Bull* 48:345–355
  10. **Jones CD, Suarez T, Massey EH, Black LJ, Tinsley FC** 1979 Synthesis and anti-estrogenic activity of [3,4-dihydro-2-(4-methoxyphenyl)-1-naphthalenyl] [4-[2-pyrrolidinyl] ethoxy]-phenyl] methanone, methanesulfonic acid salt. *J Med Chem* 22:962–966
  11. **Black LJ, Jones CD, Falcone JF** 1983 Antagonism of estrogen action with a new benzothiophene derived antiestrogen. *Life Sci* 32:1031–1036
  12. **Gottardis MM, Jordan VC** 1987 Antitumor actions of keoxifene and tamoxifen in the N-nitrosomethylurea-induced rat mammary carcinoma model. *Cancer Res* 47:4020–4024
  13. **Gottardis MM, Ricchio ME, Satyaswaroop PG, Jordan VC** 1990 Effect of steroidal and nonsteroidal antiestrogens on the growth of a tamoxifen-stimulated human endometrial carcinoma (EnCa101) in athymic mice. *Cancer Res* 50:3189–3192
  14. **Black LJ, Sato M, Rowley ER, Magee DE, Bendele A, Williams DC, Cullinan GJ, Bendele R, Kauffman RF, Bensch WR, Frolik CA, Termine JD, Bryant HU** 1994 Raloxifene (LY139481 HCl) prevents bone loss and reduces serum cholesterol without causing uterine hypertrophy in ovariectomized rats. *J Clin Invest* 93:63–69
  15. **Draper MW, Flowers DE, Huster WJ, Neild JA, Harper KD, Amaud C** A controlled trial of raloxifene (LY139481) HCl: impact on bone turnover and serum lipid in healthy, postmenopausal women. *J Bone Miner Res*, in press
  16. **Evans RM** 1988 The steroid and thyroid hormone receptor superfamily. *Science* 240:889–895
  17. **O'Malley B** 1990 The steroid receptor superfamily: more excitement predicted for the future. *Mol Endocrinol* 4:363–369
  18. **Klein-Hitpass L, Schorpp M, Wagner U, Ryffel GU** 1986 An estrogen-responsive element derived from the 5' flanking region of the *Xenopus* vitellogenin A2 gene functions in transfected human cells. *Cell* 46:1053–1061
  19. **Komm BS, Terpening CM, Benz DJ, Graeme KA, Gallegos A, Korc M, Greene GL, O'Malley BW, Haussler MR** 1988 Estrogen binding, receptor mRNA, and biologic response in osteoblast-like osteosarcoma cells. *Science* 241:81–84
  20. **Eriksen EF, Colvard DS, Berg NJ, Graham ML, Mann KG, Spelsberg TC, Riggs BL** 1988 Evidence of estrogen receptors in normal human osteoblast-like cells. *Science* 241:84–88
  21. **Finkelman RD, Bell NH, Strong DD, Demers LM, Baylink DJ** 1992 Ovariectomy selectively reduces the concentration of transforming growth factor  $\beta$  in rat bone: implications for estrogen deficiency-associated bone loss. *Proc Natl Acad Sci USA* 89:12190–12193
  22. **Oursler MJ, Cortese C, Keeting P, Anderson MA, Bonde SK, Riggs BL, Spelsberg TC** 1991 Modulation of transforming growth factor-beta production in normal human osteoblast-like cells by 17 beta-estradiol and parathyroid hormone. *Endocrinology* 129:3313–3320
  23. **Jilka RL, Hangoc G, Girasole G, Passeri G, Williams DC, Abrams JS, Boyce B, Broxmeyer H, Manolagas SC** 1992 Increased osteoclast development after estrogen loss: mediation by interleukin-6. *Science* 257:88–91
  24. **Sato F, Ouchi Y, Masuyama A, Nakamura T, Hosoi T, Okamoto Y, Sasaki N, Shiraki M, Orimo H** 1993 Effects of estrogen replacement on insulin-like growth factor I concentrations in serum and bone tissue and on interleukin 1 secretion from spleen macrophages in oophorectomized rats. *Calcif Tissue Int* 53:111–116
  25. **Mundy GR** 1991 The effects of TGF- $\beta$  on bone. In: *Clinical Applications of TGF- $\beta$* . Chichester, Wiley, pp 137–151
  26. **Derynck R, Lindquist PB, Lee A, Wen D, Tamm J, Graycar JL, Rhee L, Mason AJ, Miller DA, Coffey RJ, Moses HL, Chen EY** 1988 A new type of transforming growth factor- $\beta$ , TGF- $\beta$ -3. *EMBO J* 7:3737–3743
  27. **Ogawa Y, Schmidt DK, Dasch JR, Chang R-J, Glaser CB** 1992 Purification and characterization of transforming growth factor- $\beta$ 2.3 and - $\beta$ 1.2 heterodimers from bovine bone. *J Biol Chem* 267:2325–2328
  28. **Reese JC, Katzenellenbogen BS** 1991 Differential DNA-binding abilities of estrogen receptor occupied with two classes of antiestrogens: studies using human estrogen receptor overexpressed in mammalian cells. *Nucleic Acids Res* 19:6595–6602
  29. **Kim S-J, Glick A, Sporn MB, Roberts AB** 1989 Characterization of the promoter region of the human transforming growth factor- $\beta$ 1 gene. *J Biol Chem* 264:402–408
  30. **O'Reilly MA, Geiser AG, Kim S-J, Bruggeman LA, Luu AX, Roberts AB, Sporn MB** 1992 Identification of an activating transcription factor (ATF) binding site in the human transforming growth factor-b2 promoter. *J Biol Chem* 267:19938–19943
  31. **Lafyatis R, Lechleider R, Kim S-J, Jakowlew S, Roberts AB, Sporn MB** 1990 Structural and functional characterization of the transforming growth factor  $\beta$ 3 promoter. *J Biol Chem* 265:19128–19136
  32. **Alvarez JI, Eitelbaum SL, Blair HC, Greenfield EM, Athanasou NA, Ross FP** 1991 Generation of avian cells resembling osteoclasts from mononuclear phagocytes. *Endocrinology* 128:2324–2335
  33. **Hiura K, Lim S-S, Little SP, Lin S, Sato M** 1995 Differentiation dependent expression of tensin and cortactin in chicken osteoclasts. *Cell Motil Cytoskeleton* 30:272–284
  34. **Blair HC, Kahn AJ, Crouch EC, Jeffrey JJ, Teitelbaum SL** 1986 Isolated osteoclasts resorb the organic and inorganic components of bone. *J Cell Biol* 102:1164–1172
  35. **Takahashi N, Akatsu T, Udagawa N, Sasaki T, Yamaguchi A, Moseley J, Martin TJ, Suda T** 1988 Osteoblastic cells are involved in osteoclast formation. *Endocrinology* 123:2600–2602
  36. **Chenu C, Pfeilschifter J, Mundy GR, Roodman GD** 1988 Transforming growth factor  $\beta$  inhibits formation of osteoclast-like cells in long-term human marrow cultures. *Proc Natl Acad Sci USA* 85:5683–5687
  37. **Shah M, Foreman DM, Ferguson MW** 1995 Neutralisation of TGF-beta 1 and TGF-beta 2 or exogenous addition of TGF-beta 3 to cutaneous rat wounds reduces scarring. *J Cell Sci* 108:985–1002
  38. **Bonewald LF, Dallas SL** 1994 Role of active and latent transforming growth factor  $\beta$  in bone formation. *J Cell Biochem* 55:350–357
  39. **Oursler MJ** 1994 Osteoclast synthesis and secretion and activation of latent transforming growth factor beta. *J Bone Miner Res* 9:443–452
  40. **Moses HL, Tucker RF, Leof EB, Coffey RJ, Halper J, Shipley GD** 1985 Type-beta transforming growth factor is a growth stimulator and a growth inhibitor. *Cancer Cells* 3:65–71
  41. **Sporn MB, Roberts AB, Wakefield LM, de Crombrughe B** 1987 Some recent advances in the chemistry and biology of transforming growth factor-beta. *J Cell Biol* 105:1039–1045
  42. **Roberts AB, Sporn MB** 1992 Mechanistic interrelationships between two superfamilies: the steroid/retinoid receptors and transforming growth factor- $\beta$ . *Cancer Surv* 14:205–220
  43. **Flanders KC, Ludecke GL, Engels S, Cissel DS, Roberts AB, Kondaiah P, Lafyatis R, Sporn MB, Unsicker K** 1991 Localization and actions of transforming growth factor-betas in the embryonic nervous system. *Development* 113:183–191
  44. **Merwin JR, Newman W, Beall LD, Tucker A, Madri JA** 1991 Vascular cells respond differently to transforming growth factors beta 1 and beta 2 in vitro. *Am J Pathol* 138:37–51
  45. **Nicholson AC, Hajjar DP** 1992 Transforming growth factor-beta up-regulates low density lipoprotein receptor-mediated cholesterol metabolism in vascular smooth muscle cells. *J Biol Chem* 267:25982–25987
  46. **Grainger DJ, Weissberg PL, Metcalfe JC** 1993 Tamoxifen decreases the rate of proliferation of rat vascular smooth-muscle cells in culture by inducing production of transforming growth factor beta. *Biochem J* 294:109–112
  47. **Perrella MA, Yoshizumi M, Fen Z, Tsai JC, Hsieh CM, Kourembanas S, Lee ME** 1994 Transforming growth factor-beta 1, but not dexamethasone, down-regulates nitric-oxide synthase

- mRNA after its induction by interleukin-1 beta in rat smooth muscle cells. *J Biol Chem* 269:14595–14600
48. **Knabbe C, Lippman ME, Wakefield LM, Flanders KC, Kasis A, Derynck R, Dickson RB** 1987 Evidence that transforming growth factor- $\beta$  is a hormonally regulated negative growth factor in human breast cancer cells. *Cell* 48:417–428
49. **Oberhammer FA, Pavelka M, Sharma S, Tiefenbacher R, Purchio AF, Bursch W, Schulte-Hermann R** 1992 Induction of apoptosis in cultured hepatocytes and in regressing liver by transforming growth factor beta 1. *Proc Natl Acad Sci USA* 89:5408–5412
50. **Moulton BC** 1994 Transforming growth factor-beta stimulates endometrial stromal apoptosis *in vitro*. *Endocrinology* 134:1055–1060
51. **Prehn JH, Bindokas VP, Marcuccilli CJ, Krajewski S, Reed JC, Miller RJ** 1994 Regulation of neuronal Bcl2 protein expression and calcium homeostasis by transforming growth factor type beta confers wide-ranging protection on rat hippocampal neurons. *Proc Natl Acad Sci USA* 91:12599–12603
52. **Pasinetti GM, Nichols NR, Tocco G, Morgan T, Laping N, Finch CE** 1993 Transforming growth factor beta 1 and fibronectin messenger RNA in rat brain: responses to injury and cell-type localization. *Neuroscience* 54:893–907
53. **Kraus WL, Katzenellenbogen BS** 1993 Regulation of progesterone receptor gene expression and growth in the rat uterus: modulation of estrogen actions by progesterone and sex steroid hormone antagonists. *Endocrinology* 132:2371–2379
54. **Campen CA, Jordan VC, Gorski J** 1985 Opposing biological actions of antiestrogens *in vitro* and *in vivo*: induction of progesterone receptor in the rat and mouse uterus. *Endocrinology* 116:2327–2336
